# Supplementary material for: Can Ethograms Be Automatically Generated Using Body Acceleration Data from Free-Ranging Birds?
Source: PubMed Central journal article supplement (PMC2671159; doi:10.1371/journal.pone.0005379), 2009-04-30
Supplement: pone.0005379.s001.pdf [file pone.0005379.s001.pdf]

1 **Title**

2 Can Ethograms Be Automatically Generated Using Body Acceleration Data from  
3 Free-Ranging Birds?

4

5 (和訳)

6 体の加速度情報から野外で行動する鳥類のエソグラムを自動作成する試み

7

8 **Authors and Affiliations**

9 Kentaro Q Sakamoto<sup>1\*</sup>, Katsufumi Sato<sup>2</sup>, Mayumi Ishizuka<sup>1</sup>, Yutaka Watanuki<sup>3</sup>,

10 Akinori Takahashi<sup>4</sup>, Francis Daunt<sup>5</sup>, Sarah Wanless<sup>5</sup>

11

12 (1) Graduate School of Veterinary Medicine, Hokkaido University, Sapporo, Hokkaido,

13 Japan

14 (2) International Coastal Research Center, Ocean Research Institute, The University of

15 Tokyo, Otsuchi, Iwate, Japan

16 (3) Graduate School of Fisheries Science, Hokkaido University, Hakodate, Hokkaido,

17 Japan.

18 (4) National Institute of Polar Research, Itabashi, Tokyo, Japan.

19 (5) Centre for Ecology and Hydrology, Bush Estate, Penicuik, Midlothian, United

20 Kingdom.

21

22 \* Corresponding author: Kentaro Q Sakamoto

23 E-mail: sakamoto@vetmed.hokudai.ac.jp

24

25

26

## 27 **Abstract**

28 エソグラムとは、個々の動物種に特有で典型的な行動をまとめたカタロ  
29 グである。動物行動の記録は、伝統的に対象種を直接観察することによって行  
30 われてきた。ただし、深海や空中など人間の視界から遠く離れた場所で為され  
31 る行動の場合、直接観察による行動の記録は難しく、不可能な場合も多い。動  
32 物装着型データロガーが近年洗練されてきたことによって、この問題は克服さ  
33 れつつある。特に、加速度計は飛翔・歩行・遊泳などに伴う体の動的加速度を  
34 記録することが可能なため、行動を記録するのに役に立つ。しかし、これまで  
35 は対象動物の野外における行動がどのようなものであるかが事前に分かってい  
36 なければ、体の加速度データを元に行動を分類することは出来なかった。私達  
37 は、本論文で体の加速度を元に行動を自動分類する方法を示すと共に、この方  
38 法を簡単に実行することが出来る Ethographer というコンピューターソフトウェ  
39 アを公開した。足漕ぎによって潜水を行う海鳥のヨーロッパヒメウ  
40 (*Phalacrocorax aristotelis*) の体の長軸方向の加速度を用いて、本方法の性能を  
41 評価した。まず、得られた時系列加速度データを連続ウェーブレット変換によ

42 　　ってスペクトルに変換した。その後、1秒ごとに計算したスペクトルを教師なし  
43 　　分類法 (*k*-means 法) によって 20 個のグループに分類した。典型的なものとし  
44 　　て抽出された行動は、体の加速度の周期によって記述することができた。それ  
45 　　ぞれの行動は、対象個体が陸上での休息、飛行、海面での休息、潜水などを行  
46 　　っている行動に対応していると考えられた。本方法で分類された行動は、深度  
47 　　データを元に独立に定義した行動とよく一致した。本方法は教師なし分類法を  
48 　　用いていることから、これまで知られていなかった行動や未知の行動連鎖を検  
49 　　出できる可能性がある。

50

51

52

## 53 **Introduction**

54 　　動物の生活を理解するには、その行動を調べることが必要不可欠である。  
55 　　行動を研究する上で、まず最初に行うことは、対象種によって為される特有の  
56 　　行動を分類し、カタログを作成することである。このカタログをエソグラムと  
57 　　いう。対象を直接観察しエソグラムを作成することは、その行動を理解するた  
58 　　めの根本的な作業である[1]。しかし、人間が観察できないところで生活の大部  
59 　　分を営む飛翔動物や潜水動物の場合、この方法は現実的ではない。そのような  
60 　　場合は、バイオテレメトリーを用いた間接的な観察によって、遠隔から動物の  
61 　　行動を調べることが可能である[2]。加えて、近年、動物装着型データロガー（セ  
62 　　ンサー付き記録装置）を用いることによって、動物が移動する間に計測される

63 行動・環境情報を記録することができるようになった（これをバイオリギング  
64 と言う[3-5]）。データロガーが発達し、多様なセンサーを用いることによって  
65 大量の行動学的、生理学的情報を計測・記録することが可能となってきた。精  
66 密に行動を記録するために、照度計[6]、デジタルカメラ[7]、ビデオカメラ[8]な  
67 どが搭載されたデータロガーが、これまで動物に装着されてきた。これらの装  
68 置の中で、動物の行動を野外で記録するのに最も力を発揮する装置の1つとし  
69 て加速度計がある。加速度計は、静的加速度（static acceleration）と動的加速度  
70 （dynamic acceleration）の両方を同時に記録する。静的加速度は動物の体軸角度  
71 に由来し、動的加速度は体の動きに由来する。この二つの情報から、さまざま  
72 な行動パターンを判別することが出来る[9-13]。

73 私達が知る限り、複数の行動パターンの判別を目的として加速度計を用  
74 いた最初の試みは、Yoda et al. [9]によるものである。彼らの研究では、2軸記録  
75 型の加速度計を用いて、アデリーペンギン（*Pygoscelis adeliae*）の行動（直立姿  
76 勢、腹這い姿勢、歩行、イルカ泳ぎ、トボガン歩行）を判別した。この研究で、  
77 著者らは記録された加速度データを眼で確認することによって、それぞれの行  
78 動パターンを判別した。その後、イエネコ（*Felis catus*）を対象として、さらに  
79 洗練された方法が Watanabe et al. [11]によって発表された。彼らは事前に加速度  
80 計が装着された動物の行動をビデオカメラで撮影して、それぞれの行動パター  
81 ンに対応する加速度信号を得た。その後、高速フーリエ変換を用いて加速度信  
82 号が持つ周波数特性を抽出し、抽出された情報に対してステップワイズ正準判  
83 別分析を行うことで、数種類の行動パターンを区別した。さらに最近では、加

84 速度信号の特徴から決定樹を作成し、これを元に行動を判別する簡便な方法も  
85 考案された[12,13]。これら全ての方法は、行動の判別に際して、研究者が事前に  
86 判別基準を作成する必要があった[11-14]。動物が取りうる行動について十分な  
87 情報を手に入れることができる場合であれば、これらの方法は非常に有用であ  
88 る。しかしながら、海洋など、観察者の視界から遠く離れた場所で多くの時  
89 間を過ごす動物の場合、行動判別の基準を作成するために十分な情報を得るこ  
90 とは、しばしば困難である。

91         この欠点を克服するために、私達は加速度計から動物の行動を判別する  
92 ための新しい方法を考案した。この方法は二つの手順より構成される。まず、  
93 最初の工程で加速度信号を教師なし分類法により複数の行動グループに分類す  
94 る。その後、分類されたグループがいかなる行動を意味するのか、研究者が解  
95 釈する（例えば、歩行や遊泳、睡眠など）（Guilford et al. [15]を見よ）。基本的  
96 な行動パターンについての知見が欠けている場合、分類された行動パターンが  
97 何を意味するか直ちには解釈できない場合もある。たとえば、深度 1,000m にお  
98 けるマッコウクジラ (*Physeter macrocephalus*) の行動を直接観察した人間はいな  
99 い。したがって、研究者は得られた手がかりだけを頼りにマッコウクジラの行  
100 動を解釈しているのである。このような行動を **putative behavior** と呼ぶ。しかし、  
101 たとえ特定の種類の行動パターンが今の段階では直接観察できないとしても、  
102 その行動パターンを他の行動パターンとは明瞭に違うものとして区別し、分類  
103 することは、その動物がどのように生き、また周辺環境と関係し合っているか  
104 を描き出すための重要な最初の一步となるはずである。

105           動物の動きに由来する加速度信号における振動は通常、周期と強さが変  
106 動する。私達が考案した方法では、加速度信号を連続ウェーブレット変換  
107 (continuous wavelet transformation)して1秒ごとのスペクトルを計算し、その後、  
108 スペクトルを教師なし分類法 (*k*-means 法) によって分類した。振動データの解  
109 析では、高速フーリエ変換が広く用いられている (例えば、音声の解析) [11]。  
110 しかし、音声情報に比べると、体の加速度信号は単位時間 (例えば、それぞれ  
111 の行動パターン) 当たりで非常にわずかな振動しか有していない。従って、そ  
112 れぞれの時刻における行動を高精度に感知するためには、短時間に発生した小  
113 さい変化を検出することの出来る連続ウェーブレット変換の方が好ましい。連  
114 続ウェーブレット変換は高速フーリエ変換に類似の方法であるが、フーリエ変  
115 換は定常的な振動に適用されることを想定しているのに対して、連続ウェーブ  
116 レット変換はそうでない、ということが大きな違いとして挙げられる。フーリ  
117 エ変換でも窓関数を用いることで、それぞれの時刻における局所的なスペクト  
118 ルを算出することができるが、変換に用いる振動の数は窓関数内における信号  
119 の周波数に依存する。従って、振動を検出する感度は、窓関数内における信号  
120 の周波数が異なれば変化してしまう。振動の性状が変動する信号のスペクトル  
121 を計算する場合、フーリエ変換に比べて連続ウェーブレット変換では、バイア  
122 スが少なく、安定した状態でスペクトルを計算できるといえる[16]。最近、気候  
123 変動[17]や伝染病伝播[18]、個体群動態[19,20]の分野で振動現象を解析するた  
124 んに、連続ウェーブレット変換は用いられるようになってきた。*k*-means 法は、大

125 規模データを解析するのに適した方法としてよく知られており、生成するグル  
126 ープ数を変数として設定することで教師なし分類を行うことができる[21]。

127 私達の方法の有効性を試験するために、ヨーロッパヒメウ  
128 (*Phalacrocorax aristotelis*) の体の加速度データを計測した。ヨーロッパヒメウ  
129 は、足漕ぎによって潜水を行う中型の海鳥である。個々の行動パターンによっ  
130 て生み出される体の加速度の特徴は過去に明らかになっているため[22,23]、この  
131 種は本研究に理想的な動物種であった。本論文では、体の加速度よりエソグラ  
132 ムを生成する私達の新しい方法を示すと共に、ヨーロッパヒメウの既に知られ  
133 た行動パターンとの比較を通じて、その性能を評価する。

134

135

## 136 **Methods**

### 137 Ethics statement

138 本研究はScottish Natural Heritage によって発行されたResearch Permits  
139 15/R/38とMON/RP/69及びBird Scientific Licences 4480と6676の許可の元に遂行さ  
140 れた。

141

### 142 The study species

143 野外調査地（英国スコットランドの南東部沖にあるメイ島、56°11' N,  
144 02°33' W）におけるヨーロッパヒメウの採餌活動はVHFテレメトリーおよび加速  
145 度計を含む多種の動物装着型データロガーによって広く研究が行われて来た

146 [22-26]。対象種は、日中に採餌を行う。育雛期間中は、1日当たりおよそ1~4回  
147 の採餌トリップを行う[24]。採餌後、ヒナへ給餌するための餌を胃に一時的に蓄  
148 え、営巣地へ運ぶ[25-28]。彼らは足漕ぎによって潜水を行い、この営巣地では  
149 lesser sandeel (*Ammodytes marinus*)やbutterfish (*Pholis gunnellus*)といった海底に生  
150 息する小型魚類を主に餌としている。水中で潜行と浮上を行う時には、水中を  
151 ほぼ垂直に移動する。水中での推進のための足漕ぎ周波数は、深度と共に5Hz  
152 から2Hz (0.2から0.5秒周期)へと著しく減少する[22]。また、ヒメウは採餌場所  
153 へは飛行により移動し、この時には約5.5Hz (0.18秒周期)の連続的な羽ばたき  
154 を行う[23]。

155

#### 156 Field work

157 野外調査は、2003年と2006年の繁殖期に、英国スコットランドのメイ島  
158 で行った。小型から中型のヒナを育雛している個体を研究に用いた(2003年に  
159 14羽と2006年に2羽)。長い棒の先端に金属製の鉤を装着した器具を用いて、巣  
160 にいる個体を捕獲した。鳴き声と体サイズから性判定を行った(オスは鳴き、  
161 また体がメスに比べて大きい)。2003年には、データロガーを2本のプラスチック  
162 ケーブルタイと防水テープを用いてプラスチックネット(3cm x 5cm)に固定  
163 したものを、速乾性接着剤によって背中を中心部の羽毛に装着した。2006年に  
164 は、防水テープのみを用いて装着した。ハンドリング時間は10分以内であった。  
165 放鳥後、全ての個体は直ちに巣にもどり、日中のうちに自発的に採餌トリップ  
166 へ出かけた。データロガーを装着した個体は、その日の最後の採餌トリップが



167 終了した後、夜間もしくは翌日に再度捕獲し、データロガーを回収した。

168

## 169 Instruments

170 加速度データロガー（M190L-D2GT；リトルレオナルド、東京）を用い  
171 て、24時間以上の精密な体の加速度データを取得した（メモリ容量制限のため、  
172 最大28時間の記録）。データロガーは直径15mm、長径53mm、空気中での重量  
173 が18gで、深度（1Hz）、2軸の加速度（64Hz、本研究では1軸分のデータのみ用  
174 いた）、温度（1Hz、本研究ではデータを用いなかった）を記録するよう設定し  
175 た。データロガーを装着したことによって、採餌トリップ中のエネルギー消費  
176 量が増大した可能性はあるが、空気中でのデータロガーの重量はヨーロッパヒ  
177 メウの体重（オス $1896 \pm 121$ 、メス $1619 \pm 99$  g；平均  $\pm$  標準偏差）の約1%であ  
178 り、採餌トリップの際にヒメウが持ち帰る魚の重量（平均106g）に比べて非常  
179 に軽かった[27]。その上、巣で観察された行動からは、データロガーの装着が対  
180 象個体に影響を及ぼしていることを示唆する知見は得られなかった。そのため、  
181 私達はデータロガーによって得られたデータは、ヨーロッパヒメウの正常な行  
182 動を反映していると想定した。

183 加速度計は、体の長軸方向（surge）の加速度成分を計測するように装着  
184 した（Fig. 1）。加速度計によって記録された値は、1次直線回帰式によって加速  
185 度（ $\text{m s}^{-2}$ ）に変換した。変換式を得るため、水平方向に対して90度と-90度の角  
186 度になるように加速度計を置き、記録された値を得た。この時の加速度は、そ  
187 れぞれ、 $9.8 \text{ m s}^{-2}$ と $-9.8 \text{ m s}^{-2}$ になるため、これを元に変換を行った。加速度計は、

188 動的加速度（羽ばたきなど）と静的加速度（重力など）の両方を計測する。従  
189 って、動きの無い状況であれば、surge方向の加速度は鳥の姿勢に応じた重力加  
190 速度の成分を表す。このことから、私達は加速度計の角度、つまり鳥がどのよ  
191 うな姿勢を保っているのか知ることができる（立っているのか、座っているの  
192 かなど）。これまでの知見を元に、得られた加速度データを眼で確認すること  
193 で、幾つかの行動パターンを判別した（Fig. 2）[9,22,23]。対象個体は、計測期  
194 間中に2~6回の採餌トリップを行った。個体が深度1m以上に潜った時を潜水と定  
195 義した。

196

#### 197 Continuous wavelet transformation

198 私達は、加速度データの振動が非定常状態にあることを考慮し、解析に  
199 は連続ウェーブレット変換を適用した。ウェーブレット変換は、「異なる場所  
200 にそれぞれ焦点を合わせ、観察することを可能にする“数学的顕微鏡”」と表  
201 現されている[29]。時系列データを時間成分と周期成分に分解することで、ウェ  
202 ーブレット解析はデータ中に存在する周期成分と、その周期が時間と共にどの  
203 ように変化していくのかを計算することができる[17]。マザーウェーブレットは、  
204 時間成分と周期成分の両方で定義され、時間方向の積分がゼロになる小さい波  
205 である。離散配列 $x_n$ として記録された信号の連続ウェーブレット変換は、 $x_n$ と（周  
206 期スケールと時間を変換した）マザーウェーブレット関数 $\psi$ の畳み込みとして定  
207 義される。

208 
$$W(s, n) = \sum_{n'=0}^{N-1} x_{n'} \psi \left[ \frac{(n' - n)\delta t}{s} \right] \quad (1)$$

209 ここで、 $s$  はスケール、 $n$ は解析対象となる時刻インデックス、 $\delta t$  は配列の時間  
 210 間隔、 $N$  は全体のデータ数を表す[17]。スケール $s$ と解析対象となる時刻インデ  
 211 ックス $n$ が変動することによって、各スケールにおける信号強度とその強度が時  
 212 間に伴ってどのように変化していくのかを描き出すことができる。

213 私達は、Morletマザーウェーブレット関数を用いて、異なるスケール $s$ に  
 214 おける振幅の分布の時間的変化を解析した。Morletウェーブレット関数は以下に  
 215 定義される。

216 
$$\psi(\eta) = \pi^{-1/4} e^{i\omega_0\eta} e^{-\eta^2/2} \quad (2)$$

217 ここで、 $\omega_0$ は無次元周波数である。Morletウェーブレット関数は三角関数を基礎  
 218 としている (Fig. 3A) 。そのため、時系列データを複数のサインカーブに分解  
 219 することができ (Fig. 3B) 、生態学的現象の解析に広く用いられている[18-20]。  
 220 無次元周波数 $\omega_0$ は時系列データを時間成分と周期成分に分解するときの、相互  
 221 の分解精度のバランスを決定する変数である。 $\omega_0$ が大きい時、周期成分の分解  
 222 能は高くなるが、時間成分の分解能は低くなる。ヨーロッパヒメウの加速度デ  
 223 ータの場合、 $\omega_0 = 10$ の時に周期成分と時間成分の両方を最もバランスよく分解  
 224 することが出来たため、この値を解析に用いた。この値の時のマザーウェーブ  
 225 レットは、ほぼ7つの波から構成されている (Fig. 3A) 。このマザーウェーブ  
 226 レットを用いて信号の畳み込みを行った結果、入力信号が大体7つくらいの波  
 227 を構成している時に、時間成分と周期成分の両方の分解能が最も高くなった。

228 ウェーブレット変換の値  $W(s, n)$  と入力信号の振幅値を関係付けるた  
229 め、以下の式を定義した。

$$230 \quad A(s, n) = \frac{\sqrt{|W(s, n)|^2} \delta C_e}{s} \quad (3)$$

231 ここで  $C_e$  (1.06392) は、経験的に付加した係数である。この係数  $C_e$  を付加す  
232 ることによって、あるスケール  $s$  と時刻インデックス  $n$  における、 $x_n$  の振幅値が  
233  $A(s, n)$  値とほぼ等しくなった (Fig. 3B)。

234 入力信号の周期 $\lambda$ とスケール  $s$  は以下の関係にある[17]。

$$235 \quad \lambda = \frac{4\pi}{\omega_0 + \sqrt{2 + \omega_0^2}} s \quad (4)$$

236 従って、(3)式は、以下の式になる。

$$237 \quad A(\lambda, n) = \frac{\sqrt{|W(k\lambda, n)|^2} \delta C_e}{k\lambda} \quad (5)$$

238 かつ

$$239 \quad k = \frac{\omega_0 + \sqrt{2 + \omega_0^2}}{4\pi} \quad (6)$$

240 これによって、入力信号がある時刻インデックス  $n$  において周期 $\lambda$ の信  
241 号をもつ時、その三角関数成分の振幅値と  $A(\lambda, n)$ 値は一致する。私達は、その  
242 後のクラスター分析を行うことが可能な量にデータ量を減らすため、各周期 $\lambda$ に  
243 おける  $A(\lambda, n)$ の値を1秒ごとに平均した値を求めた。これを、ここでは「行動  
244 スペクトル」 (behavior spectrum) と呼ぶ (Fig. 3B, C, D)。行動スペクトルは、

245 毎秒ごとの各時刻において、入力信号にそれぞれの周期成分がどのように分布  
246 しているかを表している。私達は、0.05 から 1 秒周期の範囲で 64 段階にわたっ  
247 て行動スペクトルの値を計算した。

$$248 \quad \lambda = C_{\min} \times 2^{\frac{i \log_2(C_{\max} / C_{\min})}{T}} \quad (i=1, 2, 3, \dots, 64) \quad (7)$$

249 ここで、 $T$  は時間段階の数 (64 段階)、 $C_{\min}$  は解析を行う最短周期 (0.05 秒)、  
250  $C_{\max}$  は最長周期を (1 秒) を表す。

251 以上の手順によって、一秒ごとの動物の動きが行動スペクトルによって  
252 表現された。各時刻における行動スペクトルの形は入力された信号が持つ周期  
253 と振幅の特徴が反映された。通常、動物の動きから生み出される信号は、単一  
254 の三角関数の形ではなく、複数のサインカーブが合成された形をしている。そ  
255 れぞれのサインカーブは、異なる振幅を持つと共に整数倍ずつ異なる周波数を  
256 有している。この中で、最も低い周波数を **fundamental** 周波数と呼び、それ以外  
257 の物を **harmonics** と呼ぶ (Fig. 3B)。入力信号中の **fundamental** 周波数が、動物  
258 の動きの周期を表しているとみなした[30]。

259 本方法で計算された振幅は、動物の動きの大きさと直接に比例している  
260 わけではない。しかし、**Morlet** ウェーブレット関数を用いた畳み込みにより、  
261 加速度信号は複数のサインカーブに分解され、逆にいえば、分解されたサイン  
262 カーブを合計したものは、(変換に用いた周期の範囲内では) 元の入力信号と  
263 同じ形になる。そのため、信号を分解することで生成されたサインカーブの組  
264 み合わせが類似している時には、それらの信号は類似した動きを示唆している  
265 と考えることができるであろう[30]。類似した特徴を示す行動スペクトルどうし

266 を比べるのであれば、それらのスペクトルが意味する同じ行動パターンの範囲  
267 内で個々の動きの相対的な大きさを評価することが出来ると考えられる。

268 「cone of influence」は、ウェーブレット変換を行った際に、時系列デー  
269 タの始まりと終わりの部分で過小に信号強度が見積もられてしまう現象のこと  
270 である[17]。cone of influence の影響を避けるために、私達は行動スペクトルの最  
271 初と最後を解析の最長周期の 3 倍分の長さだけ切り取り、その後の解析には用  
272 いなかった。

273

## 274 Clustering

275 私達は、エソグラムを作るために  $k$ -means 法によって、毎秒ごとの行動  
276 スペクトルをグループ分けした。 $k$ -means 法は教師なし分類法であり、各クラス  
277 ター内で個々の点と各クラスターの重心間のユークリッド距離の二乗を最小に  
278 するアルゴリズムである。このアルゴリズムは以下の手順で構成される[21]。

279

280 1, クラスター分けする点が存在する空間に  $k$  個の点をランダムに配置する。

281 これらの点は、最初の段階の重心である。

282 2, 個々の点と各重心の間の距離を求め、最も近い距離に位置する重心に対  
283 応するクラスターに個々の点を割り当てる。

284 3, 全ての点を、それぞれのクラスターに割り当てた後、再度  $k$  個のクラス  
285 ターの重心を計算する。

286 4, 重心が移動しなくなるまで、手順 2 と 3 を繰り返す。これによって、各  
287 点と重心間の距離が最小となる、複数のクラスターを生成することがで  
288 きる。

289

290 毎秒ごとの行動スペクトルは 64 段階の周期によって構成された。言い  
291 換えれば、各スペクトルは 64 個の値で定義されたといえる。従って、これは 64  
292 次元空間における点の定義と数学的に等しい。私達は、64 次元空間上に存在す  
293 る点をクラスター分けするのと同じ方法で行動スペクトルのグループ分けを行  
294 った[31]。

295

#### 296 Acceleration ethogram

297 エソグラムを作るにあたって、私達はオス、メス 3 羽ずつのヨーロッパ  
298 ヒメウから得られた、1 個体あたり 24 時間分のデータを用いた。まず、surge 方  
299 向の加速度成分から行動スペクトルを計算した。繁殖期のヨーロッパヒメウの  
300 全ての行動パターンを網羅するには、行動を表す要素（行動要素、behavior  
301 element）の数として 20 種類を想定するのが適切であろう、と私達は考えた。そ  
302 こで、6 羽から得られた行動スペクトルを連結し、ここから *k*-means 法によって、  
303 64 次元空間における 20 個の重心を決定した。これらの重心は、それぞれの行動  
304 要素における典型的なスペクトルを表現するものとなった。私達は、この 20 個  
305 のスペクトル一式を「加速度エソグラム（acceleration ethogram）」とみなした。

306

307 Behavior discrimination by acceleration ethogram

308 次に、16羽から得られた surge 方向の加速度成分を行動スペクトルに変  
309 換した。1秒ごとに得られたスペクトルは、64次元空間内の点として捉える事  
310 ができる。これらの点と、加速度エソグラムとしてすでに得られている20個の  
311 要素に対応する重心とのユークリッド距離の二乗を計算した。各点について、  
312 最も小さい値が算出された重心を決定し、それぞれの点を対応する加速度エソ  
313 グラム中の行動要素に割り当てた。

314

315 Behavior discrimination by water depth

316 我々の方法の正確さを評価するため、16羽から得られた時系列深度デー  
317 タを用いて各個体が各種の行動に費やした時間配分を算出した。ヨーロッパヒ  
318 メウの典型的な採餌トリップは、以下のように行われる。ヒメウは繁殖地から  
319 採餌場所へ飛行によって移動し、採餌場所では連続して潜水を行う。各潜水の  
320 前後は海面上で過ごす。その後、再び繁殖地へ飛行して戻る[32]。時系列深度デ  
321 ータから、次の6種類の行動パターンを定義した（陸上での行動、移動、潜行、  
322 海底での行動、浮上、海面での休息）。潜水中における個々の行動パターンは  
323 深度データの変化率を元に定義した（潜行： $-0.6 \text{ m s}^{-1}$ 以下、海底での行動： $-0.3$   
324  $\sim +0.3 \text{ m s}^{-1}$ 、浮上： $1 \text{ m s}^{-1}$ 以上）。ヒメウの潜水は、通常、バウト構造をしてい  
325 る。Watanuki et al. [33]に従って、個別のバウトを判別するためのバウト終了基  
326 準は340秒とした[34]。潜水バウト内における潜水前後の時間は、海面で休息し  
327 ていると定義した。採餌トリップ中の採餌場所との往復に要する飛行時間は30



328 分以下であると報告されている[32]。そのため、潜水バウト前後の 30 分間は「移  
329 動」行動を行っているとして定義した。残りの時間は、陸上ですごしている時間と  
330 定義した。時系列深度データから定義された個々の行動パターンに費やした期  
331 間に、加速度エソグラムで定義された各行動要素がどれだけの割合で占めてい  
332 るのかを計算した。

333

#### 334 Computer application

335       本研究で示す方法を簡便に行うために、私達は Ethographer という操作  
336 が簡単なコンピューターソフトウェアを開発した。プログラムコードは、Igor Pro  
337 ver.5(WaveMetrics Inc., Lake Oswego, OR, USA)を用いて、Igor Pro 言語で書かれた。  
338 このソフトは、Igor Pro 上で動作する。また、グラフィカルインターフェイスを  
339 有していて、簡単に使用方法を習得することができる。Ethographer は、学術目  
340 的の場合は無償で使用することができる。  
341 (<http://bre.soc.i.kyoto-u.ac.jp/bls/index.php?Ethographer>).

342

343

## 344 Results

345       surge 方向の加速度成分を、加速度エソグラムに従って 20 種類の行動要  
346 素に分類した。加速度エソグラムの行動要素は、加速度データの特徴を反映し  
347 たスペクトルによって記述された (Fig. 4)。幾つかの要素のスペクトルの形は  
348 類似していた (例えば、要素 0, 1, 2 や要素 14, 15, 16, 17) (Fig. 4)。これらの

349 要素は異なる周期と振幅を持つが同じ行動パターンを表していると考えられた。  
350 エソグラム中の卓越周期における振幅の範囲は、0.024（要素7における0.11秒  
351 周期）から5.072（要素3における0.13秒周期）であった。一般的に、大きな振  
352 幅を持つ行動要素ではスペクトルに明瞭なピークが現れたが、小さい振幅だけ  
353 を有する行動要素では比較的平らなスペクトルになる傾向が認められた。これ  
354 は、大きな動きを伴う行動パターンは周期的な動きによって構成されているの  
355 に対し、そうではない行動パターンには周期性があまり見られないことを意味  
356 していると考えられた。

357 私達の方法を適用した例を Figure 5 に示す。行動スペクトルを見ると、  
358 左側の領域では非常に弱い信号だけが認められる (Fig. 5D)。これは、surge 方  
359 向の加速度成分がほとんど存在しなかったこと (Fig. 5C) を意味しており、対  
360 象個体に動きがなかったことを示唆している。これとは対照的に中央の領域で  
361 は約 0.18 秒周期の明瞭なピークが認められた。これは、ヒメウの羽ばたき周波  
362 数と一致している (5.5Hz, [23])。右側の領域では、弱く不明瞭な信号がスペク  
363 トル中に認められ、0.3 秒以上の弱い周期性を持つ信号の存在を示している。こ  
364 れは、例えば海面での休息行動など、対象個体が不安定な姿勢を取っているこ  
365 とに由来していると考えられる。下のパネルに、*k*-means 法によるグループ分け  
366 の結果を示す (Fig. 5E)。明らかに左（陸上、要素6と7）、中央（羽ばたき、  
367 要素1）、右（海面での休息、要素9）の3つの領域に行動が分類されたことが  
368 分かる。行動が明らかに4つに分類された、もう一つの例を Fig. 6 に示す。それ  
369 ぞれが海面での休息、潜行、海底での行動、浮上に対応していた (Fig. 6D)。

370 潜行時には、深度に応じて卓越周期が変わり、水面近くでは 0.2 秒周期の動きが  
371 深度 40m では 0.5 秒周期まで長くなっていた。この結果は、ヒメウが潜行する  
372 ときに、深度に応じて足漕ぎ周波数を 5Hz (0.2 秒周期) から 2Hz (0.5 秒周期)  
373 まで変化させているという報告と一致した[22]。海底での行動スペクトルの特徴  
374 は、0.4 秒と 0.2 秒周期に認められる乱雑で不明瞭なピークに認められた。浮上  
375 時には、スペクトル中にピークは認められなかった。海面での休息 (要素 9) 、  
376 海底での行動 (主に要素 10) 、浮上 (要素 7) の 3 種類の行動を、*k*-means 法に  
377 よって明瞭に分類することが出来た。グループ分けの結果において興味深い点  
378 は、潜行行動の分類結果である。潜行は複数の行動要素の連なりとして分類さ  
379 れた (順番に要素 13, 14, 15, 16, 17, 10) 。これらの行動要素を記述するスペクト  
380 ルを見てみると、要素 13 は大きな振幅を持つ複数のピークが存在するという特  
381 徴を持っていた (Fig. 4D) 。要素 14-17 のスペクトルは類似していたが、14 か  
382 ら 17 に向かって徐々に卓越周期が長くなり、振幅は小さくなっていった。要素  
383 10 は最も長い卓越周期をもち、最も小さい振幅を示した。これらの行動要素の  
384 連なりは、潜行時に足漕ぎ行動の周期と強さが深度に伴って変化するという過  
385 去の報告と一致するものであった[22]。1 回の採餌トリップ全体を俯瞰してみる  
386 と (Fig. 7) 、ほぼ 1.8 秒周期の動きを表す要素 0, 1, 2 が潜水バウトの前後に見  
387 られ、これが連続的な飛行を示していると考えられた。潜水バウト中に見られ  
388 る要素 14, 15, 16, 17 は潜行行動を意味しているのであろう。

389 加速度エソグラムで規定された各行動要素がどの程度出現するか調べ  
390 ると、深度データによって定義された各行動パターンが見られた期間ごとに、

391 それぞれの行動要素が占めた割合が異なっていた (Fig. 8)。幾つかの行動パタ  
392 ーンでは、1つか2つの行動要素によって、その多くを占められていた。例をあ  
393 げると、陸上行動 (要素 6 と 7)、海面での休息 (要素 6 と 9)、海底での行動  
394 (要素 10 と 11)、浮上 (要素 7) など。面白いことに、海底での行動において  
395 要素 10 と 11 が出現する割合は、個体間で大きくばらついていた (Fig. 8)。要  
396 素 10 は周期性のない動き、要素 11 は 0.3 秒周期の動きを示唆している (Fig. 4)。  
397 メイ島のヨーロッパヒメウは底棲生物を捕食するが、岩場と砂場という二つの  
398 環境の異なる採餌場所を利用している [33]。この二種類の採餌場所で、ヒメウの  
399 採餌行動は顕著に異なる。岩場では主として海底に沿って水平方向の移動を行  
400 うのに対して、砂場では海底の特定の場所に留まり採餌を行う。現段階では、  
401 要素 10 と 11 がどのような動作なのかを正確に同定することはできないが、採  
402 餌場所利用の個体差によって、この二つの行動要素の出現割合の大きな個体差  
403 が生み出されているのかもしれない。潜行の行動パターンでは、足漕ぎの周期  
404 と強さに対応する複数の行動要素が現れた (Fig. 6 と Fig. 8D)。移動時 (Fig. 8C)  
405 には、最も多くの行動要素が出現した (要素 0, 1, 6, 7, 8, 9)。これは、この行動  
406 パターンを潜水バウトの前後 30 分間と定義したため、移動のための羽ばたきだ  
407 けでなく、陸上や海面で過した期間の行動も含まれてしまったことが原因であ  
408 ると考えられる。移動時における要素 7 と 9 の成分は、それぞれ陸上と海面で  
409 の行動から派生したのではないかと思われる (Fig. 7 を見よ)。移動時に特有の  
410 行動要素は、要素 0 と 1 であった。これらの要素の卓越周期は 0.18 秒であり、  
411 これはヨーロッパヒメウの羽ばたき周期と一致した。

412 海面で対象個体が休息している時に得られる加速度信号は、海の状況な  
413 ど周辺環境の影響を受ける可能性がある。私達が解析を行ったデータからは、  
414 そのような影響は何ら認められなかったが、周辺環境の違いによって異なる行  
415 動スペクトルが計算され、その結果、「海面での休息行動」が加速度エソグラ  
416 ム中の複数の異なる行動要素として認識されてしまう可能性がある。

417

418

## 419 **Discussion**

420 加速度エソグラムを作成するために私達の方法を使用する場合には、  
421 個々の動物種がもつ特徴に合わせて、以下の4つの変数を設定する必要がある。  
422 一つ目は、体の加速度信号を連続ウェーブレット変換する際の計算に適用する  
423 周期の範囲である。私達は、ヨーロッパヒメウを解析するにあたって、0.05~1  
424 秒周期を選んだ。この範囲は、主にヒメウが生み出す動的加速度の周期に対応  
425 している[22]。二つ目の変数は、*k-means* 法で作り出す行動要素の数である。私  
426 達が *k-means* 法によって加速度エソグラムを作った際には、行動要素の数を 20  
427 まで増やした時に、加速度エソグラムのスペクトルの形はほとんど変化しなく  
428 なり、その代り、一つのスペクトルから形の類似した二つのスペクトルが生成  
429 されるようになった。そのため、行動要素の数を 20 個と定めれば、全ての行動  
430 パターンを網羅できるであろうと私達は考えた。また、数学的に定義された手  
431 順によって、*K-means* 法によるグループ分けは行われるため、時としてグループ  
432 分けされた結果は、研究者が心に描くものとは違ってしまう場合もある。この

433 問題の現実的な解決策としては、まず行動要素の数として十分に大きな数を設  
434 定し、その後、研究者が同じ行動を表していると考える行動要素を合体させる  
435 と良いであろう。三つ目の変数は、Morlet マザーウェーブレット関数の $\omega_0$ の値  
436 である。連続ウェーブレット変換の性質上、周期的な動きの方が周期的でない  
437 動きに比べて検出しやすい。 $\omega_0$ の値を変更することで、時間成分と周期成分の  
438 どちらの検出精度を高くして動きを検出するかを調節することができる。四つ  
439 目の変数は、単一の行動スペクトルの時間の長さである。私達は、 $A(\lambda, n)$ の値  
440 を1秒ごとに平均して行動スペクトルを計算した。一般的な目的でヨーロッパ  
441 ヒメウの各行動を調べる場合であれば、1秒間は十分に高い時間精度だと考えた  
442 ためである。この時間の長さは、一つの行動単位に対して、それぞれの動物種  
443 が取りうる最小時間を考慮した上で調節するべきであろう。私達のコンピュー  
444 ターソフトウェア「Ethographer」ではこれらの変数を調節することができる。

445  $k$ -means 法によるグループ分けでは、それぞれの行動要素で規定される  
446 行動は、定常的な周期と振幅を持つことを仮定している。そのため、例えば、  
447 「歩く」と「走る」を正確に区別することは難しい。なぜなら、この二つの行  
448 動は緩やかに連続した行動で、明確な境界線を定めることが難しいからである。  
449 グループ分けのアルゴリズムは、「歩く」または「走る」の行為に対して、微  
450 妙に異なる周期を持つ複数の行動要素を出力することだろう (Fig. 6D の潜行の  
451 部分を見よ)。このような種類の行動の場合は、その正確な定義は解析のたび  
452 に変動してしまうかもしれない。

453            今回の解析方法には、コンピューターの性能に起因する 2,3 の制約が存  
454   在することが判明している。最も重要なものは、*k*-means 法でグループ分けする  
455   ことができるデータの数についてである。本研究では、16 羽のヒメウのうちか  
456   ら 6 羽を選び、各個体で 24 時間ずつ記録されたデータ（合計  $24 \times 6 = 144$  時間）  
457   を用いて、グループ分けを行った。つまり、加速度エソグラムを作るのに用い  
458   た行動スペクトルの数は約 500,000 個であった。私達が解析を行ったコンピュー  
459   ーター（Intel Core 2 Duo 6600 CPU, 2 GB RAM）では、これが加速度エソグラム生  
460   成を行うことが可能な最大容量であった。もう一つの制約は、*k*-means 法自体に  
461   関係することである。*k*-means 法によるグループ分けの出力結果は解析を行うた  
462   びに、（ほとんど同じではあるものの）全く同じ結果を常に出力するとは限ら  
463   ない。なぜならば、*k*-means 法は最適解を求める方法ではなく、最適解に近い値  
464   を求める方法だからである。現状における計算量の問題を考慮した場合、最適  
465   解を求めることは現実な方法ではないと私達は考えた（例えば、階層的クラス  
466   タリング）。

467            本研究の結果では、体の加速度を元にグループ分けした行動は、時系列  
468   深度データから定義した行動パターンと概ね一致した。しかし、本方法では陸  
469   上行動と浮上を区別することはできなかった。私達は行動スペクトルを算出す  
470   るために、体の surge 方向の加速度成分のうち、主に動的加速度の情報を用いた。  
471   そのため、動物の体に動きがない時には、たとえ姿勢が異なっていたとしても、  
472   行動スペクトルは同じになってしまった。本研究で作られた加速度エソグラム  
473   は、対象個体の surge 方向の加速度成分の情報だけから作られた行動のカタログ

474 である。完全なエソグラムを作成するためには、深度ロガーや GPS ロガーなど  
475 と共に、体の加速度の長周期成分から得られる姿勢の情報が必要かもしれない。

476 今日に至るまで、追跡することが困難な野生動物の行動を定量化するこ  
477 とは非常に困難である。保全生物学の観点で言えば、絶滅危惧種の採餌生態に  
478 関する情報が欠如していると、有効な保全戦略の策定の障害になると考えられ  
479 る。このような動物種の、これまで知られていない生態の一面を解明するのに、  
480 私達の方法は役に立つかもしれない。特筆すべき点は、私達の方法は教師なし  
481 分類法を用いていることである。そのため、研究者がこれまで直接観察したこ  
482 とが無い新規の行動パターンであったとしても、本方法を使えば抽出できる可  
483 能性がある。本論文で示した方法は、他の動物種においても適切なエソグラム  
484 を生成できることを保証するものではない。しかし、観察することが困難な場  
485 所に生息しているために、これまで研究されてこなかった動物種の行動を調べ  
486 る場合に、本方法は大きな力を発揮すると思われる。

487

488

489

## 490 **Acknowledgments**

491 We thank G. T. Crossin for comments on the manuscript and two anonymous  
492 referees for reviewing the manuscript and helpful suggestions.

493



494

495

496 **References**

497 1. Martin P, Bateson P (2007) *Measuring Behavior: An Introductory Guide*, Third  
498 Edition. Cambridge: Cambridge University Press. 187 p.

499 2. Cooke SJ, Hinch SG, Wikelski M, Andrews RD, Kuchel LJ, et al. (2004)  
500 Biotelemetry: a mechanistic approach to ecology. *Trends Ecol Evol* 19: 334–343.

501 3. Boyd IL, Kato A, Ropert-Coudert Y (2004) Bio-logging science: sensing beyond  
502 the boundaries. *Mem Nat Inst Pol Res Tokyo* 58: 1-14.

503 4. Hooker SK, Biuw M, McConnell B, Miller PJO, Sparling CE (2007) Bio-logging  
504 science: Logging and relaying physical and biological data using animal-attached  
505 tags. *Deep-Sea Res II* 54: 177-182.

506 5. Rutz C, Hays GC (2009) New frontiers in biologging science. *Biol Lett*. Published  
507 online (doi:10.1098/rsbl.2009.0089).

508 6. Tremblay Y, Cherel Y, Oremus M, Tveraa T, Chastel O (2003) Unconventional  
509 ventral attachment of time-depth recorders as a new method for investigating time  
510 budget and diving behaviour of seabirds. *J Exp Biol* 206: 1929-1940.

511 7. Takahashi A, Sato K, Naito Y, Dunn MJ, Trathan PN, et al. (2004)  
512 Penguin-mounted cameras glimpse underwater group behaviour. *Proc R Soc B*  
513 271: S281–S282.

514 8. Rutz C, Bluff LA, Weir AAS, Kacelnik A (2007) Video cameras on wild birds.

- 515 Science 318: 765.
- 516 9. Yoda K, Naito Y, Sato K, Takahashi A, Nishikawa J, et al. (2001) A new  
517 technique for monitoring the behaviour of free-ranging Adélie penguins. J Exp  
518 Biol 204: 685-690.
- 519 10. Ropert-Coudert Y, Grémillet D, Kato A, Ryan PG, Naito Y, et al. (2004) A  
520 fine-scale time budget of Cape gannets provides insights into the foraging  
521 strategies of coastal seabirds. Anim Behav 67: 985-992.
- 522 11. Watanabe S, Izawa M, Kato A, Ropert-Coudert Y, Naito Y (2005) A new  
523 technique for monitoring the detailed behaviour of terrestrial animals: a case study  
524 with the domestic cat. Appl Anim Behav Sci 94: 117-131.
- 525 12. Wilson RP, Shepard ELC, Liebsch N (2008) Prying into the intimate details of  
526 animal lives: use of a daily diary on animals. Endang Species Res 4: 123-137.
- 527 13. Laich AG, Wilson RP, Quintana F, Shepard ELC (2008) Identification of imperial  
528 cormorant *Phalacrocorax atriceps* behavior using accelerometer. Endang Species  
529 Res. Published online (doi:10.3354/esr00091).
- 530 14. Lagarde F, Guillon M, Dubroca L, Bonnet X, Ben Kaddour K, et al. (2008)  
531 Slowness and acceleration: a new method to quantify the activity budget of  
532 chelonians. Anim Behav 75: 319-329.
- 533 15. Guilford T, Meade J, Willis J, Phillips RA, Boyle D, et al. (2009) Migration and  
534 stopover in a small pelagic seabird, the Manx shearwater *Puffinus puffinus*:  
535 insights from machine learning. Proc R Soc B 276:1215-1223.

- 536 16. Percival DB (1995) On the estimation of the wavelet variance. *Biometrika* 82:  
537 619-631.
- 538 17. Torrence C, Compo GP (1998) A practical guide to wavelet analysis. *Bull Am*  
539 *Meteor Soc* 79: 61-78.
- 540 18. Grenfell BT, Bjørnstad ON, Kappey J (2001) Travelling waves and spatial  
541 hierarchies in measles epidemics. *Nature* 414: 716-723.
- 542 19. Jenouvrier S, Weimerskirch H, Barbraud C, Park Y-H, Cazelles B (2005) Evidence  
543 of a shift in the cyclicity of Antarctic seabird dynamics linked to climate. *Proc R*  
544 *Soc B* 272: 887-895.
- 545 20. Cazelles B, Chavez M, Berteaux D, Ménard F, Vik JO, et al. (2008) Wavelet  
546 analysis of ecological time series. *Oecologia* 156: 287-304.
- 547 21. Jain AK, Murty MN, Flynn PJ (1999) Data clustering: a review. *ACM Comput*  
548 *Surv* 31: 264-323.
- 549 22. Watanuki Y, Takahashi A, Daunt F, Wanless S, Harris M, et al. (2005) Regulation  
550 of stroke and glide in a foot-propelled avian divers. *J Exp Biol* 208: 2207-2216.
- 551 23. Sato K, Daunt F, Watanuki Y, Takahashi A, Wanless S (2008) A new method to  
552 quantify prey acquisition in diving seabirds using wing stroke frequency. *J Exp*  
553 *Biol* 211: 58-65.
- 554 24. Wanless S, Harris MP (1992) At-sea activity budgets of a pursuit-diving seabirds  
555 monitored by radio telemetry. In: Priede IG, Swift SM, editors. *Wildlife telemetry:*  
556 *remote monitoring and tracking animals*. London: Ellis Horwood. pp. 591-598.

- 557 25. Wanless S, Burger AE, Harris MP (1991) Diving depths of shags *Phalacrocorax*  
558 *aristotelis* on the Isle of May. *Ibis* 133: 37-42.
- 559 26. Wanless S, Corfield T, Harris MP, Buckland ST, Morris JA (1993) Diving  
560 behaviour of the shag *Phalacrocorax aristotelis* (Aves: Pelecaniformes) in relation  
561 to water depth and prey size. *J Zool Lond* 231: 11-25.
- 562 27. Wanless S, Harris MP, Russell AF (1993) Factors influencing food-load size  
563 brought in by shags *Phalacrocorax aristotelis* during chick rearing. *Ibis* 135:  
564 19-24.
- 565 28. Watanuki Y, Takahashi A, Daunt F, Sato K, Miyazaki N, et al. (2007) Underwater  
566 images from bird-borne cameras provide clue to poor breeding success of  
567 European shags in 2005. *British Birds* 100: 466-470.
- 568 29. Karlsson S, Yu J, Akay M (2000) Time-frequency analysis of myoelectric signals  
569 during dynamic contractions: a comparative study. *IEEE Trans Biomed Eng* 47:  
570 288-237.
- 571 30. Young SS (2001) Computerized data acquisition and analysis for the life sciences.  
572 Cambridge: Cambridge University Press. 237 p.
- 573 31. Tavazoie S, Hughes JD, Campbell MJ, Cho RJ, Church GM (1999) Systematic  
574 determination of genetic network architecture. *Nat Genet* 22: 281-285.
- 575 32. Daunt F, Wanless S, Harris MP, Money L, Monaghan P (2007) Older and wiser:  
576 improvements in breeding success are linked to better foraging performance in  
577 European shags. *Funct Ecol* 21: 561-567.

- 578 33. Watanuki Y, Daunt F, Takahashi A, Newell M, Wanless S, et al. (2008)  
579 Microhabitat use and prey capture of a bottom-feeding top predator, the European  
580 shag, shown by camera loggers. Mar Ecol Prog Ser 356: 283-293.
- 581 34. Gentry RL, Kooyman GL (1986) Methods of dive analysis. In: Gentry RL,  
582 Kooyman GL, editors. Fur Seals. Princeton: Princeton University Press. pp 28-40.

583

584

585

## 586 **Figure Legends**

587

### 588 **Figure 1.**

589 データロガーを装着した位置と体の長軸 (surge) 方向の向き。

590

### 591 **Figure 2.**

592 ヨーロッパヒメウから得られたSurge方向の加速度成分と深度データ。図はそれ  
593 ぞれ、(A)陸上での行動、(B)海面での休息、(C)羽ばたき、(D)潜行、(E)海底での  
594 行動、(F)浮上を表す。

595

### 596 **Figure 3.**

597 連続ウェーブレット変換の概略図。(A)  $\omega_0 = 10$ の時のMorletマザーウェーブレッ  
598 ト関数。実線と波線はそれぞれ実数部と虚数部を表す。(B)行動スペクトルの例。

599 モデルデータは0.5秒周期のコサインカーブ(time ≤ 00:00:07)とそれぞれが0.25  
600 秒と0.5秒の周期をもつ二つのコサインカーブの合成波(time > 00:00:07)である  
601 (上)。個々のコサインカーブの振幅は1である。モデルデータから生成された  
602 行動スペクトル(下)。変換された周期の範囲は0.1秒から1秒である。(C)時刻  
603 0:00:03と(D)時刻0:00:11における行動スペクトル。行動スペクトルでピークを  
604 示した周期における振幅の値は、変換前のモデルデータに含まれる信号の振幅  
605 の値と一致する。

606

607 **Figure 4.**

608 加速度エソグラムに含まれる20種類の行動要素。エソグラムは6羽のヒメウ(オ  
609 ス3羽とメス3羽)から24時間ずつ得られたsurge方向の加速度成分から作られた。  
610 縦軸は加速度の振幅を表す。横軸は加速度の周期を表す。見やすくするために、  
611 エソグラムは6つに分割して、図示してある。

612

613 **Figure 5.**

614 エソグラムを生成する工程の見取り図(飛行中のデータ)。(A)各行動パターン  
615 (陸上行動、羽ばたき、海面での休息)はデータを眼で確認して判別した。(B)  
616 深度データ。(C)surge方向の加速度成分。(D)行動スペクトル。(E)加速度エソグ  
617 ラムで規定された行動要素。眼で確認することで判別された行動パターンと自  
618 動生成された行動要素が比較できる。

619

620 **Figure 6.**

621 エソグラムを生成する工程の見取り図（潜水中のデータ）。(A)各行動パターン  
622 （海面での休息、潜行、海底での行動、浮上）はデータを眼で確認して判別し  
623 た。(B)深度データ。(C)surge方向の加速度成分。(D)行動スペクトル。(E)加速度  
624 エソグラムで規定された行動要素。眼で確認することで判別された行動パター  
625 ンと自動生成された行動要素が比較できる。

626

627 **Figure 7.**

628 加速度エソグラムと深度データから定義された行動パターンとの間に見られる  
629 一致。(A)深度データ。(B)深度データによって定義された行動パターン。海面で  
630 の休息、潜行、海底での行動、浮上は、まとめてDive Boutとして示した。(C)加  
631 速度エソグラムで規定された各行動要素が毎分ごとに占めた割合

632

633 **Figure 8.**

634 それぞれの行動パターン中に各行動要素が占めた割合。それぞれの行動パター  
635 ンの期間中に、加速度エソグラムで規定された各行動要素が占めた割合を箱ひ  
636 げ図で表した（n=16）。それぞれの行動パターンは深度データによって定義さ  
637 れた。それぞれの図は、(A)陸上での行動、(B)海面での休息、(C)移動、(D)潜行、  
638 (E)海底での行動、(F)浮上を行っている期間に各行動要素が占めた割合を表して  
639 いる。箱ひげ図は、中央値（中心線）、上位と下位四分位（箱の境界線）、10%  
640 と90%パーセンテイル（ひげの先端）をそれぞれ示している。
